# Supplementary material
Source: PubMed Central journal article supplement (PMC2605020)
Supplement: 10.3163.1536-5050.97.1.007.sg001.pdf [file 10.3163.1536-5050.97.1.007.sg001.pdf]

## Mapping the health research landscape in Sub-Saharan Africa: a study of trends in biomedical publications

Karen J. Hofman, MD; Christine W. Kanyengo, MALS; Barbara A. Rapp, PhD; Sheldon Kotzin, MLS

**Figure 1**  
Trends in publishing by authors in five comparison countries over a ten-year period (1995–2004)

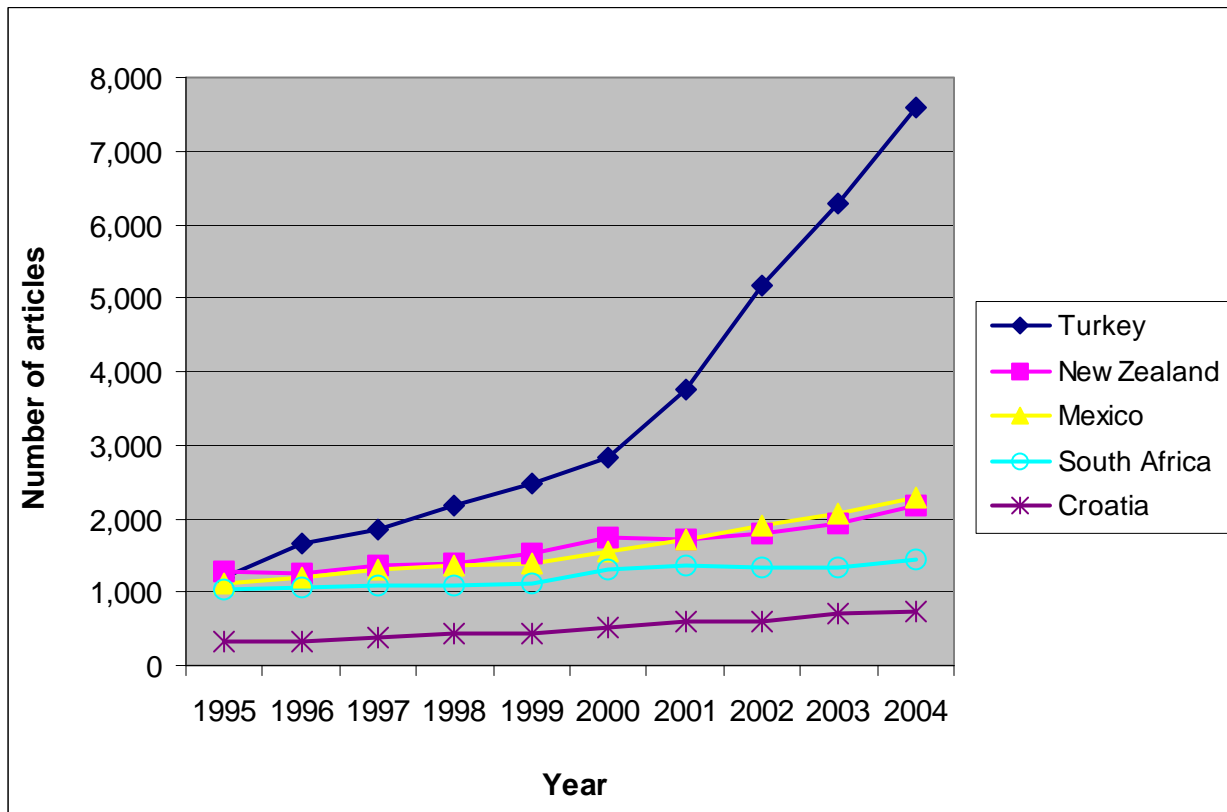

The same source data are reflected in Table 3.
