# Supplementary material
Source: PubMed Central journal article supplement (PMC2605020)
Supplement: 10.3163.1536-5050.97.1.007.sg002.pdf [file 10.3163.1536-5050.97.1.007.sg002.pdf]

**Mapping the health research landscape in Sub-Saharan Africa: a study of trends in biomedical publications**

**Karen J. Hofman, MD; Christine W. Kanyengo, MALS; Barbara A. Rapp, PhD; Sheldon Kotzin, MLS**

**Table 1**  
Volume of publications from Sub-Saharan Africa (SSA) region (1995–2004)

| <b>Country</b>              | <b>No. of Articles</b> | <b>% of total</b> | <b>Country</b>           | <b>No. of Articles</b> | <b>% of total</b> |
|-----------------------------|------------------------|-------------------|--------------------------|------------------------|-------------------|
| South Africa                | 12,193                 | 41.5%             | Benin                    | 145                    | 0.5%              |
| Nigeria                     | 4,727                  | 16.1%             | Niger                    | 130                    | 0.4%              |
| Kenya                       | 1,927                  | 6.6%              | Mozambique               | 114                    | 0.4%              |
| Zimbabwe                    | 989                    | 3.4%              | Guinea-Bissau            | 81                     | 0.3%              |
| Senegal                     | 981                    | 3.3%              | Central African Republic | 65                     | 0.2%              |
| Ethiopia                    | 885                    | 3.0%              | Mauritius                | 52                     | 0.2%              |
| Tanzania                    | 719                    | 2.4%              | Chad                     | 51                     | 0.2%              |
| Ghana                       | 670                    | 2.3%              | Sierra Leone             | 46                     | 0.2%              |
| Uganda                      | 664                    | 2.3%              | Guinea                   | 43                     | 0.1%              |
| Cameroon                    | 660                    | 2.2%              | Rwanda                   | 41                     | 0.1%              |
| Côte d'Ivoire               | 522                    | 1.8%              | Namibia                  | 36                     | 0.1%              |
| Sudan                       | 484                    | 1.6%              | Mauritania               | 35                     | 0.1%              |
| Malawi                      | 412                    | 1.4%              | Burundi                  | 31                     | 0.1%              |
| Burkina Faso                | 360                    | 1.2%              | Swaziland                | 18                     | 0.1%              |
| Gambia                      | 336                    | 1.1%              | Lesotho                  | 15                     | 0.1%              |
| Madagascar                  | 325                    | 1.1%              | Somalia                  | 12                     | —                 |
| Zambia                      | 257                    | 0.9%              | Angola                   | 9                      | —                 |
| Eritrea                     | 253                    | 0.9%              | Seychelles               | 8                      | —                 |
| Gabon                       | 227                    | 0.8%              | Comoros                  | 7                      | —                 |
| Botswana                    | 178                    | 0.6%              | Equatorial Guinea        | 4                      | —                 |
| Mali                        | 169                    | 0.6%              | Liberia                  | 3                      | —                 |
| Togo                        | 168                    | 0.6%              | Djibouti                 | 3                      | —                 |
| Congo (Democratic Republic) | 159                    | 0.5%              | Cape Verde               | 0                      | —                 |
| Congo (Republic)            | 159                    | 0.5%              | Sao Tome and Principe    | 0                      | —                 |
| Total in SSA                |                        |                   |                          |                        | 29,370            |
