# Supplementary material
Source: PubMed Central journal article supplement (PMC2605020)
Supplement: 10.3163.1536-5050.97.1.007.sg003.pdf [file 10.3163.1536-5050.97.1.007.sg003.pdf]

**Mapping the health research landscape in Sub-Saharan Africa: a study of trends in biomedical publications**

**Karen J. Hofman, MD; Christine W. Kanyengo, MALS; Barbara A. Rapp, PhD; Sheldon Kotzin, MLS**

---

**Table 3**  
Number of articles published by authors in five comparison countries over a ten-year period (1995–2004)

---

|              | <b>1995</b> | <b>1996</b> | <b>1997</b> | <b>1998</b> | <b>1999</b> | <b>2000</b> | <b>2001</b> | <b>2002</b> | <b>2003</b> | <b>2004</b> | <b>Total</b> |
|--------------|-------------|-------------|-------------|-------------|-------------|-------------|-------------|-------------|-------------|-------------|--------------|
| Turkey       | 1,196       | 1,673       | 1,843       | 2,168       | 2,477       | 2,825       | 3,751       | 5,182       | 6,288       | 7,580       | 34,983       |
| New Zealand  | 1,266       | 1,248       | 1,356       | 1,392       | 1,527       | 1,751       | 1,718       | 1,798       | 1,919       | 2,183       | 16,158       |
| Mexico       | 1,125       | 1,200       | 1,307       | 1,357       | 1,387       | 1,540       | 1,702       | 1,917       | 2,074       | 2,281       | 15,890       |
| South Africa | 1,043       | 1,057       | 1,099       | 1,099       | 1,116       | 1,302       | 1,360       | 1,338       | 1,333       | 1,446       | 12,193       |
| Croatia      | 340         | 325         | 372         | 425         | 433         | 515         | 589         | 602         | 702         | 746         | 5,049        |
| Total        | 3,587       | 4,121       | 4,506       | 4,917       | 5,391       | 6,116       | 7,171       | 8,897       | 10,281      | 12,044      | 72,080       |
