# Supplementary material
Source: PubMed Central journal article supplement (PMC2605020)
Supplement: 10.3163.1536-5050.97.1.007.sg004.pdf [file 10.3163.1536-5050.97.1.007.sg004.pdf]

**Mapping the health research landscape in Sub-Saharan Africa: a study of trends in biomedical publications**

**Karen J. Hofman, MD; Christine W. Kanyengo, MALS; Barbara A. Rapp, PhD; Sheldon Kotzin, MLS**

**Table 4**  
Distribution of publications by Sub-Saharan African country (1995–2004)

|              | <b>National</b> | <b>%</b>   | <b>Sub-Saharan Africa</b> | <b>%</b>  | <b>Europe</b> | <b>%</b>   | <b>USA</b>   | <b>%</b>   | <b>Other</b> | <b>%</b>  | <b>Total</b>  |
|--------------|-----------------|------------|---------------------------|-----------|---------------|------------|--------------|------------|--------------|-----------|---------------|
| South Africa | 2,219           | 18%        | 240                       | 2%        | 5,638         | 46%        | 3,549        | 29%        | 470          | 4%        | 12,193        |
| Nigeria      | 1,528           | 32%        | 453                       | 10%       | 2,120         | 45%        | 402          | 9%         | 215          | 5%        | 4,727         |
| Kenya        | 527             | 27%        | 43                        | 2%        | 852           | 44%        | 431          | 22%        | 73           | 4%        | 1,927         |
| Zimbabwe     | 326             | 33%        | 83                        | 8%        | 406           | 41%        | 155          | 16%        | 20           | 2%        | 991           |
| Senegal      | 323             | 33%        | 43                        | 4%        | 498           | 51%        | 107          | 11%        | 8            | 1%        | 981           |
| Ethiopia     | 234             | 26%        | 172                       | 19%       | 350           | 40%        | 107          | 12%        | 20           | 2%        | 885           |
| Tanzania     | 0               | —          | 138                       | 19%       | 462           | 64%        | 105          | 15%        | 12           | 2%        | 719           |
| Ghana        | 0               | —          | 149                       | 23%       | 361           | 55%        | 111          | 17%        | 34           | 5%        | 660           |
| Uganda       | 55              | 8%         | 107                       | 16%       | 352           | 53%        | 120          | 18%        | 33           | 5%        | 670           |
| Cameroon     | 0               | —          | 37                        | 6%        | 445           | 67%        | 153          | 23%        | 21           | 3%        | 664           |
| <b>Total</b> | <b>5,212</b>    | <b>21%</b> | <b>1465</b>               | <b>6%</b> | <b>11,484</b> | <b>47%</b> | <b>5,240</b> | <b>21%</b> | <b>906</b>   | <b>4%</b> | <b>24,417</b> |
