# Supplementary material
Source: PubMed Central journal article supplement (PMC2605020)
Supplement: 10.3163.1536-5050.97.1.007.sg005.pdf [file 10.3163.1536-5050.97.1.007.sg005.pdf]

**Mapping the health research landscape in Sub-Saharan Africa: a study of trends in biomedical publications**

**Karen J. Hofman, MD; Christine W. Kanyengo, MALS; Barbara A. Rapp, PhD; Sheldon Kotzin, MLS**

**Table 5**  
Frequency of articles indexed in MEDLINE by Sub-Saharan African (SSA) authors in top-ten producing nations on the five most common SSA diseases published between 1995 and 2004

|              | <b>HIV/AIDS</b> | <b>%</b>  | <b>Malaria</b> | <b>%</b>  | <b>Parasitic disease</b> | <b>%</b>   | <b>Cancer</b> | <b>%</b>  | <b>Cardio-vascular disease</b> | <b>%</b>  | <b>Total</b>  |
|--------------|-----------------|-----------|----------------|-----------|--------------------------|------------|---------------|-----------|--------------------------------|-----------|---------------|
| South Africa | 799             | 7%        | 89             | 1%        | 588                      | 5%         | 1,051         | 9%        | 943                            | 8%        | 12,193        |
| Nigeria      | 149             | 3%        | 208            | 4%        | 494                      | 10%        | 362           | 8%        | 295                            | 6%        | 4,727         |
| Kenya        | 163             | 8%        | 235            | 12%       | 268                      | 14%        | 95            | 5%        | 48                             | 2%        | 1,927         |
| Zimbabwe     | 150             | 15%       | 32             | 3%        | 138                      | 14%        | 65            | 7%        | 54                             | 5%        | 989           |
| Senegal      | 43              | 4%        | 121            | 12%       | 189                      | 19%        | 83            | 8%        | 95                             | 10%       | 981           |
| Ethiopia     | 103             | 12%       | 29             | 3%        | 156                      | 18%        | 49            | 6%        | 28                             | 3%        | 885           |
| Tanzania     | 114             | 16%       | 85             | 12%       | 160                      | 22%        | 33            | 5%        | 22                             | 3%        | 719           |
| Ghana        | 34              | 5%        | 67             | 10%       | 154                      | 23%        | 22            | 3%        | 32                             | 5%        | 670           |
| Uganda       | 193             | 29%       | 62             | 9%        | 192                      | 29%        | 39            | 6%        | 16                             | 2%        | 664           |
| Cameroon     | 35              | 5%        | 100            | 15%       | 220                      | 33%        | 37            | 6%        | 31                             | 5%        | 660           |
| <b>Total</b> | <b>1,783</b>    | <b>7%</b> | <b>1,028</b>   | <b>4%</b> | <b>2,559</b>             | <b>10%</b> | <b>1,836</b>  | <b>8%</b> | <b>1,564</b>                   | <b>6%</b> | <b>24,415</b> |
